# Supplementary material
Source: PubMed Central journal article supplement (PMC2556829)
Supplement: pp.108.124479_1.pdf [file pp.108.124479_1.pdf]

**SUPPLEMENTAL TABLE 1**  
*Synthetic oligonucleotides used in this study*

Restriction sites are underlined. Start codons are in green and stop codons in red. Sequences complementary to the pET28b vector are in blue and the FLAG sequence is in italics.

| <b>Co-Expression &amp; BiFC Constructs (5'-3')</b> |                                                    |                            |
|----------------------------------------------------|----------------------------------------------------|----------------------------|
| P1                                                 | GATCGATCCATATGAGTTGTCCTGCGCCGGAC                   |                            |
| P2                                                 | TGATCGTTCGACCTACATAGAGCTCGAGGAAGA                  |                            |
| P3                                                 | GATCGATCCATATGAGCTGTCCGGCGACTGAT                   |                            |
| P4                                                 | TGATCCTCGAGCTACAGAGAGCTCAAGGTAGGACG                |                            |
| P5                                                 | GATCGATCCATATGGGCTGTCCTTTCCTGAC                    |                            |
| P6                                                 | TGATCCTCGAGCTAACAGAGTCCATAGCAGG                    |                            |
| P7                                                 | TATACCATGGACTACAAAGACGATGACGACAAGAGCAGCGGCCCTGGTGC |                            |
| P8                                                 | TGATCCTCGAGGATAACAATCCCCCTCTAG                     |                            |
| P9                                                 | ATAAGAATGCGGCCGCTGATCGGATCCCTACATAGAGCTCGAGGAAGA   |                            |
| P10                                                | TGATCGGATCCGATAACAATCCCCCTCTAG                     |                            |
| P11                                                | ATAAGAATGCGGCCGCTACAGAGAGCTCAAGGTAGGACG            |                            |
| P12                                                | GATCGATCCATATGGTGAGCAAGGGCGAGG                     |                            |
| P13                                                | TGATCCTCGAGTGATCTCTAGACTAGGCCATGATATAGACGTTGTGG    |                            |
| P14                                                | GATCGATCCATATGGACAAGCAGAAGAACGGCATC                |                            |
| P15                                                | TGATCCTCGAGTGATCTCTAGACTACTTGACAGCTCGTCCATGCC      |                            |
| P16                                                | TATACTGCAGATGGAAACCAATTTTTGATTCC                   |                            |
| P17                                                | TATACTGCAGCTCAGAGAGCTCAAGGTAGGACGC                 |                            |
| P18                                                | TATACCATGGGAAACTACCTTTCGATTTC                      |                            |
| P19                                                | TATACCATGGTCATAGAGCTCGAGGAAGAATGTGG                |                            |
| P20                                                | TATACCATGGACGACGGTAGAGTTAGGTAGGAATTA               |                            |
| <b>Cloning of full length cDNAs</b>                |                                                    |                            |
|                                                    | <i>Forward (5'-3')</i>                             | <i>Reverse (5'-3')</i>     |
| GGH1                                               | CTAGTCCAGTACTCAGATATAAGTTACG                       | GTGGTCCAGAACGGATAAGCTTA    |
| GGH2                                               | GCATGTTCAATACTCACAGACC                             | TCAGAGACTTGTGCTCCAATTC     |
| GGH3                                               | ATGTCTAACTACTTCCTCATTTC                            | CGATTGCTTGAAGCATGAATG      |
| <b>3' UTR Hybridization Probes</b>                 |                                                    |                            |
|                                                    | <i>Forward (5'-3')</i>                             | <i>Reverse (5'-3')</i>     |
| GGH1                                               | TTAGTGGATGTTGATCACGGGTT                            | CACTTGGAAAGCATAAAGGTTTCAG  |
| GGH2                                               | TTAGTGGATGTTGATCACGGGTT                            | CACTTGGAAAGCATAAAGGTTTCAG  |
| GGH3                                               | CAGAGGAAATGCATATGACCTAAG                           | GTTCAATTACAACCTCGAAATATCTC |
