# Supplementary material
Source: PubMed Central journal article supplement (PMC2556829)
Supplement: pp.108.124479_2.pdf [file pp.108.124479_2.pdf]

AtGGH1 MWRYICLPFFLLWNDIGLAKESBSILPSESGFVGSR-----SPVCSPPDNLNRPVIGILSHPGDG-----ASGRLENDPSSYIAASYVKFAEACGARVIPLIYNENPEILFQKLEL  
 AtGGH2 MWSYVWLPLVALSLFKDSIIMAKAAIILPSSQIGFVISR-----SPVCSAPPDNLNRPVIGILSHPGDG-----ASGRLENDPSSYIAASYVKFAEACGARVIPLIYNENPEILFQKLEL  
 AtGGH3 MWRFCEFFLSLLFFDVSAVKSABSIFFPSQIGVDSRVFESLSLSPVCSAPPDNLNRPVIGILSHPGDG-----ASGRLENDPSSYIAASYVKFAEACGARVIPLIYNENPEILFQKLEL  
 Pt1 MWNYLWIPFLLSLSEKELTLARSAATTSSPILPSSQLAD--SPS-----APKCEAPPDNLNRPVIGILSHPGDG-----ASGRLENDPSSYIAASYVKFAEACGARVIPLIYNENPEILFQKLEL  
 Pt2 MWSYLVIPFLMSLSKELTLARAATATSSPILPSSQLAD--DPS-----VPRCSAPPDNLNRPVIGILSHPGDG-----ASGRLENDPSSYIAASYVKFAEACGARVIPLIYNENPEILFQKLEL  
 Gm1 MPNDSVLSLFFVTLFTCLLSATSDDHDIILPSSQLAD--DVS-----CIATDPSLNYKPVIGILSHPGDG-----ASGRLENDPSSYIAASYVKFAEACGARVIPLIYNENPEILFQKLEL  
 Gm2 SSDAVVWLFHLAFFSQCLPSAWAHSAILPSSQLAR--SPQS-----CFAPDNLNRPVIGILSHPGDG-----ASGRLENDPSSYIAASYVKFAEACGARVIPLIYNENPEILFQKLEL  
 LeGGH1 MGNYSISIFFLLCGITTABEQLFNYSYLLPSS-----SCPAPDPALNRPVIGILSHPGDG-----ASGRLENDPSSYIAASYVKFAEACGARVIPLIYNENPEILFQKLEL  
 LeGGH2 MQMETNFLIPFFTFIQLMSTHVKEQLPSSQLNFP-----SCFATDPAALNRPVIGILSHPGDG-----ASGRLENDPSSYIAASYVKFAEACGARVIPLIYNENPEILFQKLEL  
 LeGGH3 MSNYFLISLLTSLFLVVTIIESAELFVPA-----CCPLDNLNRPVIGILSHPGDG-----DSGRLENDPSSYIAASYVKFAEACGARVIPLIYNENPEILFQKLEL  
 Os MGSPPHRLLLLAVALHRSAAAAGVRLPRGR-----ACAAPTDPAAVDRPVIGILSHPGDG-----AGGRLENDPSSYIAASYVKFAEACGARVIPLIYNENPEILFQKLEL  
 Hv MASLPQHLLPVLVLLALLGPPSSAGAGVRLPRAG-----ACAAPTDPAAVDRPVIGILSHPGDG-----AGGRLENDPSSYIAASYVKFAEACGARVIPLIYNENPEILFQKLEL  
 Zm MDSRCPHLLLLPLVLLAALLPSSSGVPEVWLPTSGG---AGPLSCAPDPAVDRPVIGILSHPGDG-----AGGRLENDPSSYIAASYVKFAEACGARVIPLIYNENPEILFQKLEL  
 RnGGH MASLGRLLCAVLLLCGLASPLSGSYERGSRRP IGLIMQBCYC-----NMTKLGFRFYIAASYVKFAEACGARVIPLIYNENPEILFQKLEL

AtGGH1 VNGVLF TGGWA--KKGYDFEIKKIFKALEKNDAGEHFPVYICLGFELLSMIISQNRDILEFEDAENASSLQFVENVNDGTFORFPPHLLKKLSTDCLVMQNHRYGISPOFQNEHLSFFFEILT  
 AtGGH2 VNGVLF TGGWA--KEGHYDFEIKKIFNKVLEKNDAGEHFPVYIACLGFELLSMIISQNRDILEFMDARNSASLQFVENVNTQGTIFORFPPHLLKKLSTDCLVMQNHRYGISPOFQNEHLSFFFEILT  
 AtGGH3 VNGVLF TGGWA--KKGHYDFEIKKIFNKVLEKNDAGEHFPVYIACLGFELLSMIISQNRDILEFNSVNYASLQFENVNIETVFORFPPHLLKKLSTDCLVMQNHRYGISPOFQNEHLSFFFEILT  
 Pt1 VNGVLF TGGWA--KKGHYDFEIKKIFKALEKNDAGEHFPVYIACLGFELLSMIISQNRDILEFEDAENASSLQFVENVNDGTFORFPPHLLKKLSTDCLVMQNHRYGISPOFQNEHLSFFFEILT  
 Pt2 VNGVLF TGGWA--KKGHYDFEIKKIFKALEKNDAGEHFPVYIACLGFELLSMIISQNRDILEFEDAENASSLQFVENVNDGTFORFPPHLLKKLSTDCLVMQNHRYGISPOFQNEHLSFFFEILT  
 Gm1 VNGVLF TGGWA--VKGHYDFEIKKIFKALEKNDAGEHFPVYIACLGFELLSMIISQNRDILEFEDAENASSLQFVENVNDGTFORFPPHLLKKLSTDCLVMQNHRYGISPOFQNEHLSFFFEILT  
 Gm2 VNGVLF TGGWA--KKGHYDFEIKKIFKALEKNDAGEHFPVYIACLGFELLSMIISQNRDILEFEDAENASSLQFVENVNDGTFORFPPHLLKKLSTDCLVMQNHRYGISPOFQNEHLSFFFEILT  
 LeGGH1 VNGVLF TGGWA--KKGHYDFEIKKIFKALEKNDAGEHFPVYIACLGFELLSMIISQNRDILEFEDAENASSLQFVENVNDGTFORFPPHLLKKLSTDCLVMQNHRYGISPOFQNEHLSFFFEILT  
 LeGGH2 VNGVLF TGGWS--KKGYDFEIKKIFKALEKNDAGEHFPVYIACLGFELLSMIISQNRDILEFEDAENASSLQFVENVNDGTFORFPPHLLKKLSTDCLVMQNHRYGISPOFQNEHLSFFFEILT  
 LeGGH3 VNGVLF TGGWA--KKGHYDFEIKKIFKALEKNDAGEHFPVYIACLGFELLSMIISQNRDILEFEDAENASSLQFVENVNDGTFORFPPHLLKKLSTDCLVMQNHRYGISPOFQNEHLSFFFEILT  
 Os VNGVLF TGGSV--KKGHYDFEIKKIFKALEKNDAGEHFPVYIACLGFELLSMIISQNRDILEFEDAENASSLQFVENVNDGTFORFPPHLLKKLSTDCLVMQNHRYGISPOFQNEHLSFFFEILT  
 Hv VNGVLF TGGSV--KKGHYDFEIKKIFKALEKNDAGEHFPVYIACLGFELLSMIISQNRDILEFEDAENASSLQFVENVNDGTFORFPPHLLKKLSTDCLVMQNHRYGISPOFQNEHLSFFFEILT  
 Zm VNGVLF TGGSE--KEGHYDFEIKKIFKALEKNDAGEHFPVYIACLGFELLSMIISQNRDILEFEDAENASSLQFVENVNDGTFORFPPHLLKKLSTDCLVMQNHRYGISPOFQNEHLSFFFEILT  
 RnGGH VNGVLF TGGC--ANLTHSGYSRVAKIFKALEKNDAGEHFPVYIACLGFELLSMIISQNRDILEFEDAENASSLQFVENVNDGTFORFPPHLLKKLSTDCLVMQNHRYGISPOFQNEHLSFFFEILT

AtGGH1 TCIDENSKTYVSTVRAKRYPIITCFQWHPEKNAFEWGSSA--IPHSEDAIQVTQHAANYLSEARAKSLN--RPESQKVLNLIYNYKPTYCGYAGIGYDEVYIFQQRSRF  
 AtGGH2 TCVD--NGKVYVSTVQSTKRYPIITCFQWHPEKNAFEWGSSK--IPHSEDAIQVTQHAANYLSEARAKSLN--RPESQKVLNLIYNYKPTYCGYAGIGYDEVYIFQQRSL  
 AtGGH3 TSADKDKSTVSTVRSKRYPIITCFQWHPEKNAFEWGSSA--IPHSEDAIQVTQHAANYLSEARAKSMN--RPSSEKVLNLIYNYKPTYCGYAGIGYDEVYIFQQRSL  
 Pt1 NSADEDNQVYVSTVQARNYPITCFQWHPEKNAFEWGSSM--IPHSEDAIQVTQHAANYLSEARAKSLN--RPPARKVLDNLIYNYKPTYCGYAGIGYDEVYIFQQRSL  
 Pt2 TSTDENQVYVSTVQACGYPITCFQWHPEKNAFEWGSSM--IPHSEDAIQVTQHAANYLSEARAKSLN--RPPARKVLDNLIYNYKPTYCGYAGIGYDEVYIFQQRSL  
 Gm1 TSGDRDCKTVSTAR--RKYPIITCFQWHPEKNAFEWGLSILKAPHEDAIQVTQSTANFSEARAKSTN--TPDAQKVRD--SLIYNYKPTYCGYAGIGYDEVYIFQQRSL  
 Gm2 TCTDEDDKVYVSTVRSQNYPIITCFQWHPEKNAFEWGSSR--IPHSEDAIQVTQHAANYLSEARAKSLN--RPPARKVLDNLIYNYKPTYCGYAGIGYDEVYIFQQRSL  
 LeGGH1 TSTDENKQVYVSTVQARNYPITCFQWHPEKNAFEWGSSR--IPHSEDAIQVTQHAANYLSEARAKSSN--RPPARKVLDNLIYNYKPTYCGYAGIGYDEVYIFQQRSL  
 LeGGH2 TSVDKKNKVYVSTVQARNYPITCFQWHPEKNAFEWGSSQ--IPHSEDAIQVTQHAANYLSEARAKSSN--RPPARKVLDNLIYNYKPTYCGYAGIGYDEVYIFQQRSL  
 LeGGH3 TSTDTRNKVYVSTVQARNYPITCFQWHPEKNAFEWGSSA--IPHSEDAIQVTQHAANYLSEARAKSSN--RPPARKVLDNLIYNYKPTYCGYAGIGYDEVYIFQQRSL  
 Os TSPDENGEVYVSTVQARNYPITCFQWHPEKNAFEWGLSILKAPHEDAIQVTQSTANFSEARAKSON--RPPARKVLDNLIYNYKPTYCGYAGIGYDEVYIFQQRSL  
 Hv TSPDENGEVYVSTVQARNYPITCFQWHPEKNAFEWGLSILKAPHEDAIQVTQSTANFSEARAKSON--RPPARKVLDNLIYNYKPTYCGYAGIGYDEVYIFQQRSL  
 Zm TSPDENKQVYVSTVQARNYPITCFQWHPEKNAFEWGLSILKAPHEDAIQVTQSTANFSEARAKSON--RPPARKVLDNLIYNYKPTYCGYAGIGYDEVYIFQQRSL  
 RnGGH VNTDG--KTE--LSSMEYKYPYIYVQWHPEKNAFEWGLSILKAPHEDAIQVTQSTANFSEARAKSON--RPPARKVLDNLIYNYKPTYCGYAGIGYDEVYIFQQRSL

## Supplemental Figure S1

Legend on following page

**Supplemental Figure S1.** Alignment of GGH amino acid sequences. Representative GGH amino acid sequences for eudicots and dicots are illustrated and compared with rat GGH. Identical residues are shaded in black, similar residues are in gray, the predicted signal peptide regions are in blue, and potential *N*-glycosylation motifs (NXS/TX, where *X* is any residue except Pro) are in green. Based on human GGH, red arrows indicate catalytically essential residues and the regions that form the dimer interface are underlined with dots. Sequences for tomato (Le), Arabidopsis (At), soybean (Gm), *Populus trichocarpa* (Pt), rice (Os), barley (Hv), maize (Zm), and rat (Rn) were compiled from EST and genome databases.
