# Supplementary material
Source: PubMed Central journal article supplement (PMC2556829)
Supplement: pp.108.124479_3.pdf [file pp.108.124479_3.pdf]

A

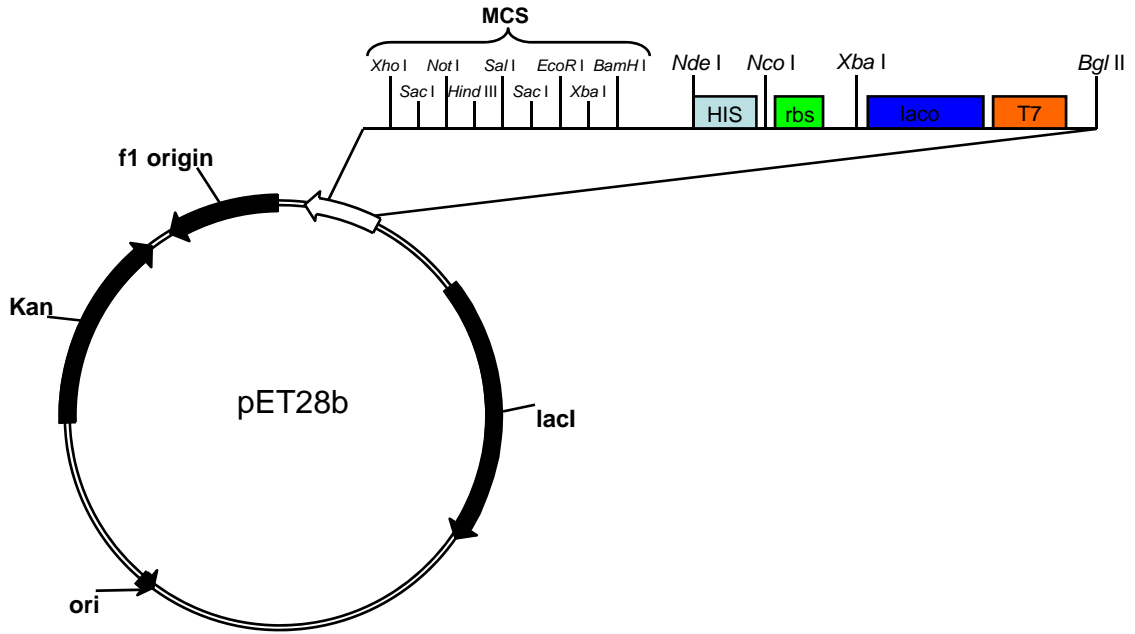

B

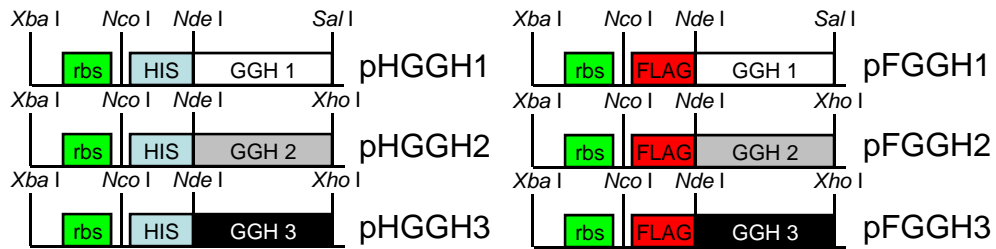

C

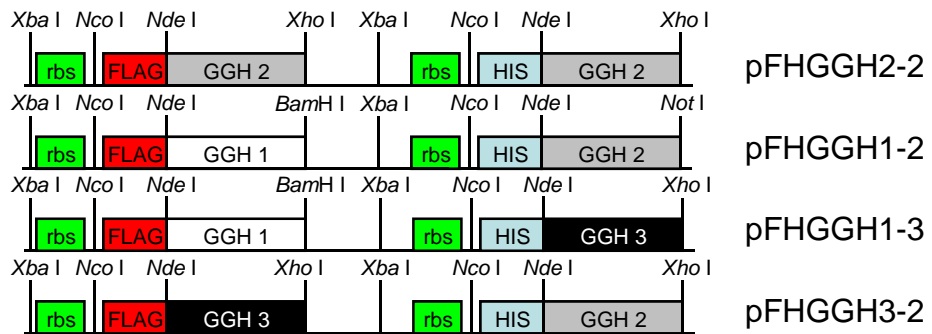

## Supplemental Figure S2

Legend on following page

**Supplemental Figure S2.** *E. coli* expression constructs. A, Schematic of the pET28b vector utilized to recombinantly express the tomato GGHs in *E. coli*. B, Expression constructs for individual GGHs. Sequences corresponding to the predicted mature GGH proteins were N-terminally fused to either the His<sub>6</sub> tag (pHGGH1, 2, or 3) or in its place, a sequence encoding the FLAG octapeptide (pFGGH1, 2, or 3). T7, T7 promoter; laco, lac operator; rbs, ribosome binding site; Kan, kanamycin resistance; f1 origin, origin of replication for f1 phage; lacI, lactose repressor; ori, pBR322 origin of replication;. C, Co-expression constructs of individually tagged GGHs. FLAG- and His<sub>6</sub>-tagged GGHs are co-expressed as a bicistronic message which incorporates an rbs between each tagged GGH sequence. The combinations of co-expressed GGHs are indicated to the right of each illustration.
