# Supplementary material
Source: PubMed Central journal article supplement (PMC2556829)
Supplement: pp.108.124479_4.pdf [file pp.108.124479_4.pdf]

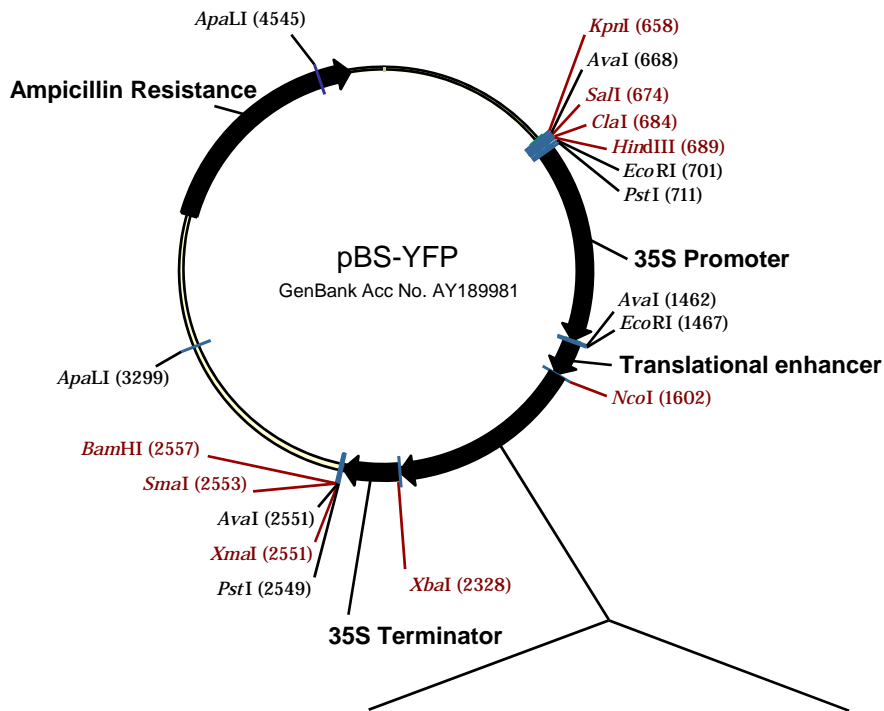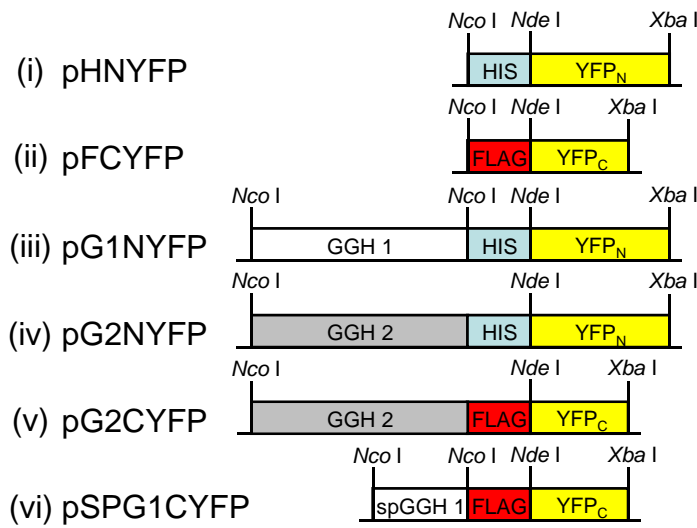

## Supplemental Figure S3

Legend on following page

**Supplemental Figure S3.** Bimolecular fluorescence complementation constructs. The YFP sequence within the pBS-YFP vector was replaced with either the (i) His<sub>6</sub>-tagged N-terminal YFP fragment (YFP<sub>N</sub>), (ii) FLAG-tagged C-terminal YFP fragment (YFP<sub>C</sub>), (iii) full-length GGH1 fused to YFP<sub>N</sub>, (iv) full-length GGH2 fused to YFP<sub>N</sub>, (v) full-length GGH2 fused to YFP<sub>C</sub>, or (vi) the signal peptide of GGH1 fused to YFP<sub>C</sub>.
